# Supplementary material for: Autosomal and X-Linked Additive Genetic Variation for Lifespan and Aging: Comparisons Within and Between the Sexes in Drosophila melanogaster
Source: Oxford University Press journal article supplement (doi:10.1534/g3.116.028308), 2016-10-07

Figure S3

Lifespan

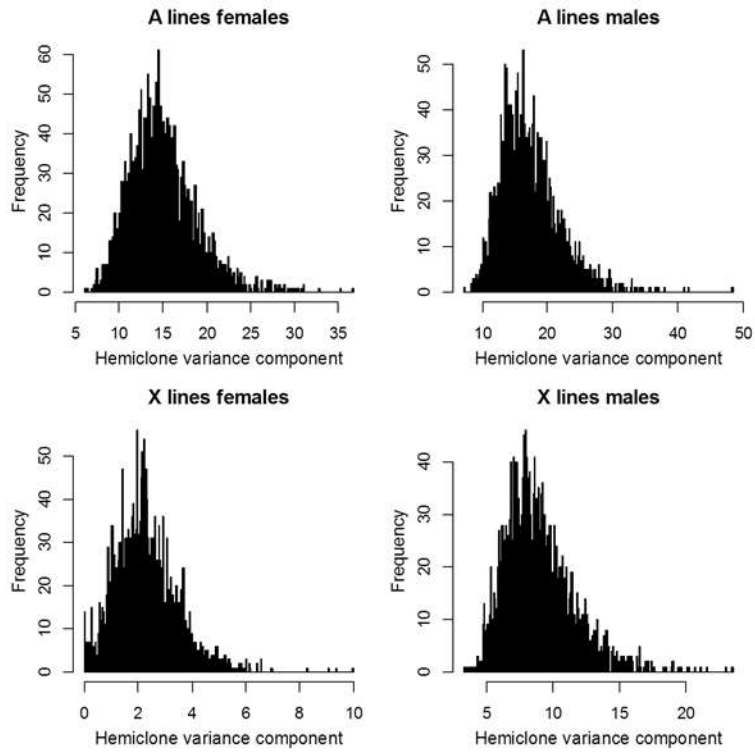

Aging

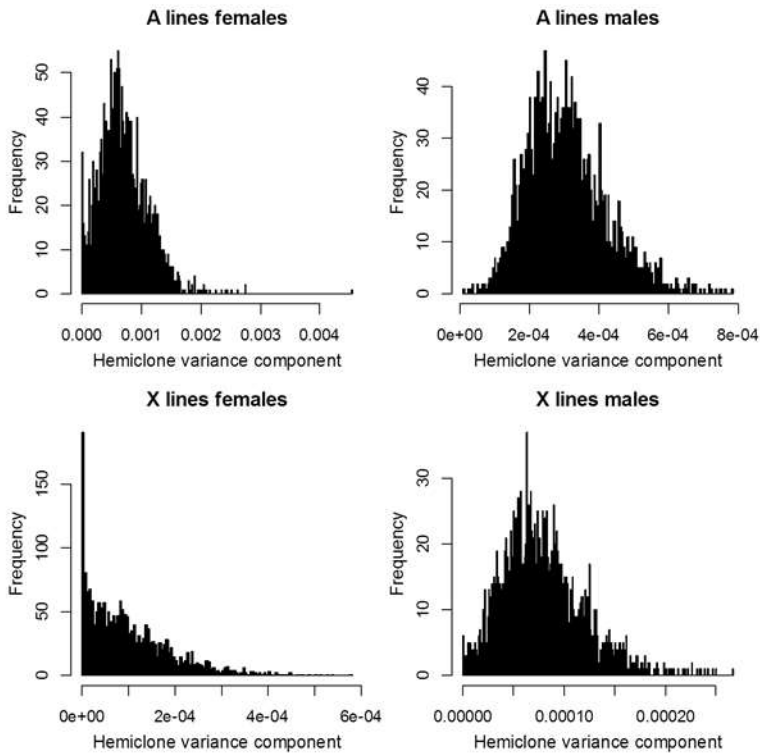

Supplement: 028308_figures3.pdf [file 028308_figures3.pdf]
