# Supplementary material for: Autosomal and X-Linked Additive Genetic Variation for Lifespan and Aging: Comparisons Within and Between the Sexes in Drosophila melanogaster
Source: PubMed Central journal article supplement (PMC5144961; doi:10.1534/g3.116.028308), 2016-09-27

Figure S4

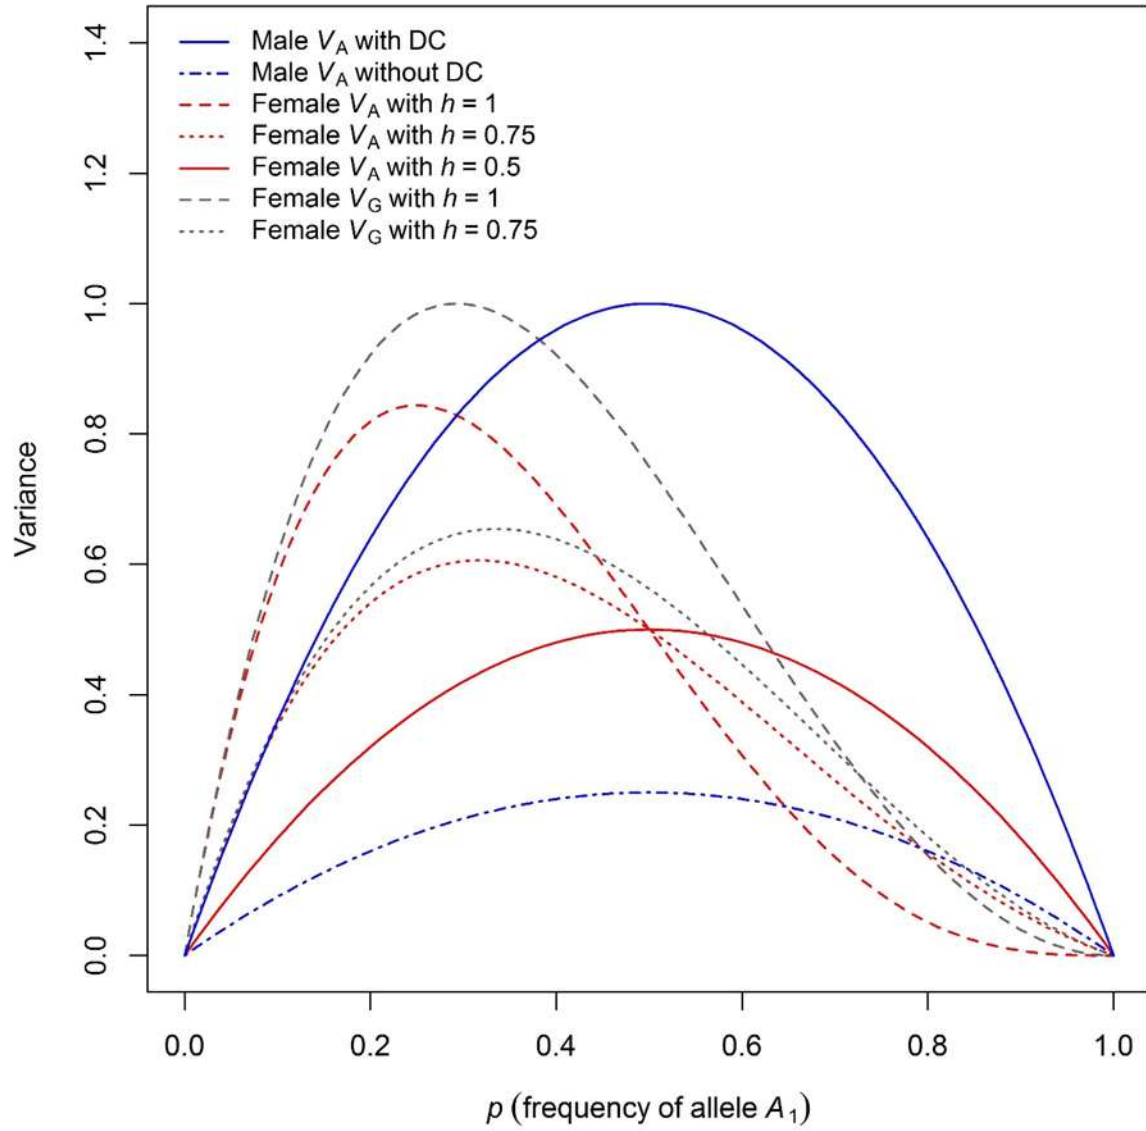

Supplement: supp_g3.116.028308_FigureS4.pdf [file supp_g3.116.028308_FigureS4.pdf]
