# Supplementary material for: Autosomal and X-Linked Additive Genetic Variation for Lifespan and Aging: Comparisons Within and Between the Sexes in Drosophila melanogaster
Source: PubMed Central journal article supplement (PMC5144961; doi:10.1534/g3.116.028308), 2016-09-27
Supplement: supp_g3.116.028308_TableS1.pdf [file supp_g3.116.028308_TableS1.pdf]

**Table S1. Mean and variance estimates for lifespan and aging including outliers (MCMCglmm).**

Values provided are the estimates from the model, followed by the standard error, and 95% credible intervals (CI). Mean lifespan is given in days, and mean aging is given for values of  $\beta$  (x 100), with estimates of line ( $V_L$ ), vial ( $V_V$ ) (only for lifespan), residual ( $V_R$ ) and phenotypic ( $V_P$ ), variance. Additive genetic variance ( $V_A$ ) and the coefficient of additive genetic ( $CV_A$ ) were calculated from the line variance and the mean.

|                   |                          | Autosomes       |                 | X-chromosomes  |                 |
|-------------------|--------------------------|-----------------|-----------------|----------------|-----------------|
|                   |                          | Female          | Male            | Female         | Male            |
| Lifespan          | <b>Mean</b>              | 62.72 ± 0.84    | 50.05 ± 0.7     | 64.29 ± 0.86   | 51.38 ± 0.51    |
|                   | CI                       | 61.1 - 64.38    | 48.66 - 51.47   | 62.55 - 65.94  | 50.39 - 52.4    |
|                   | <b><math>V_L</math></b>  | 16.61 ± 7.20    | 17.24 ± 4.60    | 9.48 ± 7.46    | 8.93 ± 2.58     |
|                   | CI                       | 5.47 - 32.97    | 10.37 - 28.04   | 0.07 - 27.25   | 5.08 - 14.71    |
|                   | <b><math>V_V</math></b>  | 45.58 ± 6.51    | 4.83 ± 0.88     | 75.69 ± 10.16  | 3.18 ± 0.69     |
|                   | CI                       | 34.77 - 60.21   | 3.29 - 6.76     | 57.86 - 98.15  | 2.03 - 4.67     |
|                   | <b><math>V_R</math></b>  | 73.88 ± 1.20    | 89.95 ± 1.46    | 63.79 ± 1.04   | 98.93 ± 1.58    |
| CI                | 71.57 - 76.21            | 87.15 - 92.76   | 61.79 - 65.81   | 95.82 - 102.15 |                 |
| Aging ( $\beta$ ) | <b><math>V_P</math></b>  | 136.07 ± 8.46   | 112.03 ± 4.85   | 148.96 ± 10.33 | 111.04 ± 3.06   |
|                   | CI                       | 121.91 - 155.06 | 104.46 - 123.08 | 131.65 - 170.8 | 106.00 - 117.69 |
|                   | <b><math>V_A</math></b>  | 33.22 ± 14.41   | 34.49 ± 9.19    | 18.96 ± 14.92  | 8.93 ± 2.58     |
|                   | CI                       | 10.94 - 65.93   | 20.74 - 56.08   | 0.14 - 54.5    | 5.08 - 14.71    |
|                   | <b><math>CV_A</math></b> | 0.090 ± 0.020   | 0.116 ± 0.015   | 0.062 ± 0.028  | 0.058 ± 0.008   |
|                   | CI                       | 0.053 - 0.130   | 0.091 - 0.150   | 0.006 - 0.115  | 0.044 - 0.075   |
|                   | <b>Mean</b>              | 16.84 ± 0.57    | 12.39 ± 0.34    | 14.17 ± 0.32   | 10.97 ± 0.2     |
| CI                | 15.71 - 17.99            | 11.73 - 13.05   | 13.52 - 14.83   | 10.58 - 11.36  |                 |
| Aging ( $\beta$ ) | <b><math>V_L</math></b>  | 6.22 ± 3.28     | 3.07 ± 1.25     | 0.77 ± 0.79    | 0.77 ± 0.40     |
|                   | CI                       | 0.65 - 13.48    | 1.11 - 6.03     | 0.00 - 2.76    | 0.13 - 1.68     |
|                   | <b><math>V_R</math></b>  | 26.09 ± 3.57    | 6.68 ± 0.90     | 13.72 ± 1.65   | 3.03 ± 0.41     |
|                   | CI                       | 20.11 - 33.83   | 5.14 - 8.62     | 10.80 - 17.15  | 2.32 - 3.94     |
|                   | <b><math>V_P</math></b>  | 32.31 ± 3.97    | 9.76 ± 1.34     | 14.48 ± 1.67   | 3.80 ± 0.48     |
|                   | CI                       | 25.38 - 40.51   | 7.50 - 12.87    | 11.51 - 18.20  | 3.00 - 4.85     |
| Aging ( $\beta$ ) | <b><math>V_A</math></b>  | 12.44 ± 6.56    | 6.14 ± 2.49     | 1.54 ± 1.57    | 0.77 ± 0.40     |
|                   | CI                       | 1.30 - 26.96    | 2.21 - 12.05    | 0.01 - 5.52    | 0.13 - 1.68     |
| Aging ( $\beta$ ) | <b><math>CV_A</math></b> | 0.201 ± 0.060   | 0.196 ± 0.041   | 0.076 ± 0.044  | 0.077 ± 0.021   |
|                   | CI                       | 0.068 - 0.310   | 0.119 - 0.279   | 0.005 - 0.166  | 0.033 - 0.119   |
