# Supplementary material for: Autosomal and X-Linked Additive Genetic Variation for Lifespan and Aging: Comparisons Within and Between the Sexes in Drosophila melanogaster
Source: PubMed Central journal article supplement (PMC5144961; doi:10.1534/g3.116.028308), 2016-09-27
Supplement: supp_g3.116.028308_TableS2.pdf [file supp_g3.116.028308_TableS2.pdf]

**Table S2. Mean and variance for lifespan as estimated by a REML model fit with outliers vials omitted.** Values provided are the point estimates and standard errors from the multivariate model fitted in ASReml for lifespan and univariate models fitted in R (package lme4, SE estimated by parametric bootstrapping) for aging.

|                 |                      | Autosomes    |               | X-chromosomes |               |
|-----------------|----------------------|--------------|---------------|---------------|---------------|
|                 |                      | Female       | Male          | Female        | Male          |
| <b>Lifespan</b> | <b>Mean</b>          | 64.78        | 49.99         | 67.79         | 51.36         |
|                 | <b>V<sub>L</sub></b> | 13.79 ± 3.52 | 15.95 ± 3.99  | 2.18 ± 0.97   | 8.03 ± 2.11   |
|                 | <b>V<sub>V</sub></b> | 4.64 ± 0.86  | 4.65 ± 0.87   | 5.55 ± 0.98   | 3.06 ± 0.66   |
|                 | <b>V<sub>R</sub></b> | 73.72 ± 1.24 | 89.94 ± 1.46  | 60.94 ± 1.05  | 98.86 ± 1.58  |
|                 | <b>V<sub>P</sub></b> | 92.15 ± 3.77 | 110.54 ± 4.28 | 68.67 ± 1.56  | 109.95 ± 2.66 |
|                 | <b>V<sub>A</sub></b> | 27.58 ± 7.05 | 31.9 ± 7.97   | 4.35 ± 1.95   | 8.03 ± 2.11   |
| <b>Aging</b>    | <b>Mean</b>          | 17.27        | 12.41         | 14.76         | 10.96         |
|                 | <b>V<sub>L</sub></b> | 6.71 ± 3.27  | 2.83 ± 1.01   | 0.62 ± 0.81   | 0.76 ± 0.35   |
|                 | <b>V<sub>R</sub></b> | 24.36 ± 3.45 | 6.34 ± 0.85   | 12.43 ± 1.71  | 2.79 ± 0.36   |
|                 | <b>V<sub>P</sub></b> | 31.07 ± 3.79 | 9.16 ± 1.22   | 13.04 ± 1.68  | 3.54 ± 0.42   |
|                 | <b>V<sub>A</sub></b> | 13.42 ± 6.54 | 5.65 ± 2.02   | 1.23 ± 1.63   | 1.51 ± 0.70   |
